# Supplementary material
Source: PubMed Central journal article supplement (PMC4156503)
Supplement: rna-11-715-s01.pdf [file rna-11-715-s01.pdf]

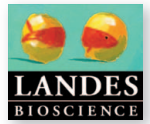

## Supplemental Material to:

Sachin Kumar Gupta, Vaibhav Chikne, Dror Eliaz,  
Itai Dov Tkacz, Ilana Naboishchikov, Shai Carmi,  
Hiba Waldman Ben-Asher, and Shulamit Michaeli

Two splicing factors carrying serine-arginine motifs, TSR1  
and TSR1IP, regulate splicing, mRNA stability, and rRNA  
processing in *Trypanosoma brucei*

2014; 11(6)

<http://dx.doi.org/10.4161/rna.29143>

[www.landesbioscience.com/journals/rnabiology/article/29143/](http://www.landesbioscience.com/journals/rnabiology/article/29143/)

### Supplemental Material

1. 2013RNABIOL0108R2-S2
2. 2013RNABIOL0108R2-S3
3. 2013RNABIOL0108R2-S5

## **S-1. List of oligonucleotides**

### **Oligonucleotides for RT-PCR**

**Sense Tb11.02.1100:** 5'-ATGGCTCTTGGATTTTCCTC-3', from position 1-20.

**Anti Tb11.02.1100:** 5'-ATGGTATGATTTCCCAATAC-3', complementary to position 400-420.

**Sense pre Tb11.02.1100:** 5'-AAACTGTAAGCTTAGTCACT-3', from position -186 to -165 of the ATG.

**SenseTb11.01.6410:** 5'-ATGTCGAAGTTAATTAAATT-3', from position 1-20.

**AntiTb11.01.6410:** 5'-TGCTTCGAAAGGCGTCAGTG-3', complementary to position 400-420.

**Sense pre Tb11.01.6410:** 5'-TTCATTCATTTAATCATTTA-3' from position -75 to -56 of the ATG.

**SenseTb927.2.3460 :** 5'-ATGGAAAGAGAGCCAGCGGT-3', from position 1-20.

**AntiTb927.2.3460 :** 5'-TTCCACGCATTGCCACTTTA-3', complementary to position 400-420.

**Sense pre Tb927.2.3460 :** 5'-CTCTTGTGCCTCAGTCACAC-3', from position -396 to -375 of the ATG.

**Sense Tb927.10.1210:** 5'-ATGGACGACGACGTGGGGCT-3', from position 1-20.

**Anti Tb927.10.1210:** 5'-AGCATAGTGGACTTCTTCAC-3', complementary to position 400-420.

**Sense pre Tb927.10.1210:** 5'-AGTTTTAAAGAGTTCCATTT-3', from position -172 to -153 of the ATG.

**SenseTb927.3.3360:** 5'-ATGGACGCCGGTAAACTTTT-3', from position 1-20.

**AntiTb927.3.3360:** 5'-CATCCGCGGACGAACATAAAA-3', complementary to position 400-420.

**Sense pre Tb927.3.3360:** 5'-GGGTCGTACCTGCTTCTTTA-3', from position -95 to -76 of the ATG.

**SenseTb927.6.3230:** 5'-ATGGTACGCAGCATTCGCTA-3', from position 1-20.

**AntiTb927.6.3230:** 5'-ATTTGCCGTCTCCCATGTGA-3', complementary to position 400-420.

**Sense pre Tb927.6.3230:** 5'-AATAACGATGATGATATTGA-3', from position -80 to -61 of the ATG.

**Sense Tb927.1.2260:** 5'-ATGGGTTGCGGTGGCTCAAC-3', from position 1-20.

**Anti Tb927.1.2260:** 5'-TTATTTCTGCCAGATCCCC-3', complementary to position 371-390.

**Sense Tb927.10.5840:** 5'-ATGTCATCGCTAAAGGAAAT-3', from position 1-20.

**Anti Tb927.10.5840:** 5'-GTCACCCACAGTAGACCAT-3', complementary to position 431-450.

**Sense pre Tb927.10.5840:** 5'- CCATATTTGCATGCCTAGCG -3', from position -140 to -131 of the ATG.

**Sense Tb11.02.4220 (Tb 927.11.6360):** 5'-ATGAGGATTGAGCAGTGTTC-3', from position 1-20.

**Anti Tb11.02.4220 (Tb 927.11.6360):** 5'-CACCGCCACAAGATCATCAC-3', complementary to position 431-450.

**Sense pre Tb11.02.4220 (Tb 927.11.6360):** 5'- CTCCTTTACTTTTATCCCC -3', from position -120 to -101 of the ATG.

**Sense Tb927.10.13730:** 5'-ATGGGTAAAAACCCTCCTAA-3', from position 1-20.

**Anti Tb927.10.13730:** 5'-GGTGAAGGGTTCAAACATA-3', complementary to position 431-450.

**Sense pre Tb927.10.13730:** 5'- ATTTTCCATCTAAACTTCT -3', from position -180 to -161 of the ATG.

**Sense Tb927.2.4710:** 5'-ATGCAACAATATACCCTTCG-3', from position 1-20.

**Anti Tb927.2.4710:** 5'-AGTACCTGCGCTTTGAAACA-3', complementary to position 431-450.

**Sense pre Tb927.2.4710:** 5'- ATATATATATATATATATA -3', from position -559 to -540 of the ATG.

**Sense Tb927.10.10010:** 5'-ATGCCAAAATCGAAGCGAGC-3', from position 1-20.

**Anti Tb927.10.10010:** 5'-CATGCTGTGTGGAAACTGTG-3', complementary to position 431-450.

**Sense pre Tb927.10.10010:** 5'- ATGAAGTTCATTTTCTTTA -3', from position -120 to -101 of the ATG.

**Sense Tb927.8.2000:** 5'-ATGCTAAAGAGCCCGCAAAA-3', from position 1-20.

**Anti Tb927.8.2000:** 5'-ACGAAACGTTGTGCCGTATA-3', complementary to position 431-450.

**Sense Tb927.5.4420:** 5'-ATGTCTTCCAGAGCTGAGGA-3', from position 1-20.

**Anti Tb927.5.4420:** 5'-TGCAGCAACCACGAGGTCCC-3', complementary to position 431-450.

**Sense pre Tb927.5.4420:** 5'- ACTGTTTTGACTGATTGCTC -3', from position -286 to -265 of the ATG.

**Sense Tb927.7.270:** 5'-ATGTCTAGCGTCGCGCTGCT-3', from position 1-20.

**Anti Tb927.7.270:** 5'-GAGGAACTCCAGGTGCTCGC-3', complementary to position 431-450.

**Sense Tb927.5.1150:** 5'-ATGCTGAGTAAAAGGAACAG-3', from position 1-20.

**Anti Tb927.5.1150:** 5'-GGGATCACCCATGGCCTCG-3', complementary to position 426-444.

**Sense Tb927.10.8450 :** 5'-ATGACTGAGCGTCGTGATAA-3', from position 1-20.

**Sense pre Tb927.10.8450:** 5'- CGTCTCCCTTCCATATTGTT -3', from position -80 to -61 of the ATG.

**Sense Tb927.2.1180 :** 5'-ATGAATCAACAGGTTTCTAT-3', from to position 1-20.

**Sense pre Tb927.2.1180:** 5'- TTGGTTTAGAAATGTATCCA -3', from position -120 to -101 of the ATG.

**Sense Tb927.7.4570:** 5'-ATGGTTCATCGAAAATTAT-3', from position 1-20.

**Sense Tb09.160.5480:** 5'-ATGCTCGGGTTTGAGTCGTT-3', from position 1-20.

**Sense pre Tb09.160.5480:** 5'- TCACACTCTTGTTGCCTAT -3', from position -139 to -120 of the ATG.

**Sense Tb11.01.5500:** 5'- AAGCGCAGCAAATTCACACC-3' from position 94 - 113.

**Anti Tb11.01.5500 :** 5'-CCACGTGACGTAATCCTCCAAG-3' complementary to position 594 - 615.

**Sense pre Tb11.01.5500:** 5'- ATATTGTCACCATTTCTACA -3', from position -60 to -41 of the ATG.

**Sense Tb11.01.1370 :** 5'-TCCCACGACGACAATCTGTTG-3' from position 307 - 327.

**Anti Tb11.01.1370 :** 5'-CCCTGTGTTGTCACATCCTGC-3' complementary to position 786 - 806.

**Sense pre Tb11.01.1370** : 5'- ATGTGGGGAAAACCACCATC -3', from position -240 to -221 of the ATG.

**Sense Tb927.7.5940** : 5'-ATGAGCGCACCCGTCGACAA-3' from position 1-20.

**Anti Tb927.7.5940** : 5'-ACCCAAGTCAAACAACATAC-3' complementary to position 401-420.

**Sense Tb927.3.3160 (PAP)**: 5'-CCCAACGAAACCACTAGAGG-3' from position 18-37.

**Anti Tb927.3.3160 (PAP)**: 5'-ATCGACAGCTGTGCCTCTG-3' complementary to position 1037-1055.

**Sense Tb09.211.3210**: 5'-ATGCTCAACAGGGACGGTAC-3' from position 1-20.

**Anti Tb09.211.3210**: 5'-GCGTCAAACCCAACAGCCCT-3' complementary to position 481-500.

**Sense Pre Tb09.211.3210**: 5'- TTCCTCCCTTTTTTTTTTCGA-3' from position -290 to -271 of ATG.

**Sense Tb927.10.2020**: 5'-ATGTCTAGACGCCTAAACAA-3' from position 1-20.

**Anti Tb927.10.2020**: 5'-GTCTGCTCCACGGGGAAACT-3' complementary to position 481-500.

**Sense Pre Tb927.10.2020** : 5'-ACCGGTGCAATACTGCCGTG-3' from position -180 to -161 of ATG.

**Sense Tb927.4.3930**: 5'-ATGACGGAAGGACTAGGCGA-3' from position 1-20.

**Anti Tb927.4.3930**: 5'-GTAGCGTCGGAGCTTTTCAC-3' complementary to position 481-500.

**Sense Pre Tb927.4.3930** : 5'-TCATTTTTTGCGGTCACCAT-3' from position -375 to -356 of ATG.

**Sense Tb927.1.2230**: 5'-ATGGGTTGTGGTGGCTCAAA-3' complementary to position 1-20.

**Anti Tb927.1.2230**: 5'-CTATTGCCTGTCTCCATCAG-3' complementary to position 481-500.

**Sense Pre Tb927.1.2230**: 5'-CACGCCTGCCTGGTCCCGTC-3' from position -433 to -414 of ATG.

**Sense Tb927.7.1910**: 5'-ATGTATCGCAGTGCGTTTCG-3', from position 1-20.

**Anti Tb927.7.1910**: 5'-GCCTCAGCACAAGCGGTTGC-3', from position 481-500.

**Sense Pre Tb927.7.1910:** 5'-TGCCATCGTTGGGGAAAATA-3' from position -108 to -89 of ATG.

**Sense Tb927.10.15410:** 5'-ATGGTCAGCGTTGCCGTAAT-3', from position 1-20.

**Anti Tb927.10.15410:** 5'-ATGAAACGGGTAGCACGGAG-3', from position 481-500.

**Sense Tb09.160.2600 (Tb927.9.4040):** 5'-ATGTCTACATCCCGCATTAC-3', from position 1-20.

**Anti Tb09.160.2600 (Tb927.9.4040):** 5'-ACAACGGTAAATTCCTCTTG-3', from position 481-500.

**Sense Pre Tb09.160.2600 (Tb927.9.4040):** 5'-TACTTCAATTTTTTTGTACC-3' from position -211 to -192 of ATG.

**Tubulin sense:** 5'- TGCGTGAGGCTATCTGCATC -3', sense, complementary to position 2- 21 of Tb927.1.2380 ( $\alpha$ Tubulin).

**Tubulin antisense:** 5'-CCCTGAAGACCAGTGCAGTTG -3', antisense, complementary to position 381-401 of Tb927.1.2380 ( $\alpha$ Tubulin).

**7SL sense:** 5'- CCGCTCGAGAGCCGGAGCGCATTGCTCTG from position 1-21 of 7SL, Tb927.8.2861.

**7SL antisense:** 5'- CCCAAGCTTCCGCCTCGCGACGACACTTG from position 255-274 of 7SL, Tb927.8.2861.

## **Oligonucleotides for T7 Transcribed RNA probes for Northern:**

**Anti T7 Tb09.160.5480:**

5'-TTAATACGACTCACTATAGGGAGAGCGTTGTAGTACGTGAGTAT-3', complementary to position 181-200.

**Anti T7 Tb927.7.4570:**

5'-TTAATACGACTCACTATAGGGAGAGCCCCACGAAAAACGGTAT-3', complementary to position 181-200.

**Anti T7 Tb927.2.1180:**

5'-TTAATACGACTCACTATAGGGAGAAACATCATATTTCTAGGATG-3',  
complementary to position 181-200.

**Anti T7 927.10.8450:**

5'-TTAATACGACTCACTATAGGGAGAGCCGTCAGGTACAGCAGCAA-3',  
complementary to position 181-200.

**Anti T7 Tb927.5.1150:**

5'-TTAATACGACTCACTATAGGGAGACTCCAGCACAAATTGCGGTA-3',  
antisense complementary to position 221-240.

**Anti T7 Tb927.10.10010 :**

5'-TTAATACGACTCACTATAGGGAGATCGGCCAAGAGCGATCATAA-3',  
antisense complementary to position 221-240.

**Anti T7 Tb11.02.4220 (Tb 927.11.6360):**

5'-TTAATACGACTCACTATAGGGAGACTTAACGGGGACGTGGCGAC-3',  
antisense complementary to position 221-240.

**Anti T7 Tb927.10.13730:**

5'- TTAATACGACTCACTATAGGGAGACCCTTGCTTTTCCCTCAGTT-3',  
antisense complementary to position 221-240.

**Anti T7 09.211.3210:**

5'-TTAATACGACTCACTATAGGGAGAAACTTGGCACCAACAATTGC -3',  
from position 181-200.

**Anti T7 Tb927.10.2020:**

5'-TTAATACGACTCACTATAGGGAGAACGGTGCTTTCACGACCCTC-3',  
from position 181-200.

**Anti T7 927.4.3930:**

5'-TTAATACGACTCACTATAGGGAGAGTGCTTGCGAGATTGAAAGA-3',  
from position 181-200.

**Anti T7 09.160.2600:**

5'-TTAATACGACTCACTATAGGGAGAAATGTGTCCAGGAGGGTGCCA-3',  
from position 181-200.

**Anti T7 927.1.2230:**

5'-TTAATACGACTCACTATAGGGAGATCCTCGCTAAAGGTAACTTT-3',

from position 181-200.

**Anti T7 927.7.1910:**

5'-TTAATACGACTCACTATAGGGAGATTCATAGGTGGTCGCATAAG-3',

from position 181-200.

**Sr1 sense (160) (+10):** 5'- AGTTCTAACTAAAATGCAGCTCACCTACG-3', sense, specific to *T. brucei* srRNA1, from position 161-179; unpaired nucleotides are highlighted in gray, used for synthesis of ITS4 PCR product for Northern analysis.

**LSUB AS T7 1-20 (+5):** 5'- TTAATACGACTCACTATAGGGAGAACTACAGTA  
CGGTCTGCAGTTGGG -3', antisense, specific to *T. brucei* LSU 3' rRNA, from position 1-19, carrying T7 promoter sequence (underlined); unpaired nucleotides are highlighted in gray, used for synthesis of ITS4 PCR product for Northern analysis.

**Oligonucleotides for Silencing Constructs:**

**TSR1:** Tb927.8.900

**Sense TSR1 Xba I:** 5'- GCTCTAGAGGAATGTGCCTTTGTCG-3' from position 513-529.

**Anti TSR1 Mlu:** 5'- CGACGCGTCTAATCTCGGCGTTTGC-3' complementary to position 971-987.

**Anti TSR1 Hind III:** 5'- CCCAAGCTTCTAATCTCGGCGTTTGC-3' complementary to position 971-987.

**TSR1 IP:** Tb927.10.2910

**Sense TSR1 IP Xba I:** 5'- GCTCTAGAATCTGAACATCCAGAGCAG-3' from position 102-120.

**Anti TSR1 IP Mlu:** 5'- CGACGCGTTATGACGATGCCTGTGAC-3' complementary to 587-603.

**Anti TSR1 IP Hind III:** 5'- CCCAAGCTTTATCACGATGCCTGTGAC-3' complementary to position 587-603.

**Oligonucleotides for PTP tagging in *T brucei* :**

**TSR1 :** linerised at position 471 with Aval



**Sense Tsr1 apa1 tap:** 5'-AAAGGGCCCGTAGTTCAACATAGTCGTGG -3' from position 241-260.

**Anti Tsr1 not1 tap:** 5'-AAAGCGGCCGCGCCATCTCGGCGTTTGCGGTAAT -3' from position 965 -984.

**TSR1 IP :** linerised at position 415 with NsiI

**Sense Tsr1 IP apa1 tap:** 5'-AAAGGGCCCCCTATTTTAGGTAATCAGCG -3' from position 241-260.

**Anti Tsr1 IP not1 tap:** 5'-AAAGCGGCCGCGCCCTCCTGTATCGCCCTTCAT -3' from position 1115 -1134.

### **Oligonucleotides for TAP tagging in *L. tarentolae*:**

**Tsr1:** LmjF.07.0870

**Sense BamHI Tsr1 tap :** 5'-AAAGGATCCATGTCACAGTCGCTCAGT-3' from position 1-18

**Anti XbaI Tsr1 tap:** 5'-GGGTCTAGAACGACGTGTGCGGCGCTCG-3' complementary to position 1098-1116.

**Tsr1IP:** LmjF.34.0495

**Sense BamHI Tsr1 IP tap :** 5'-AAAGGATCCATGGATGTGATTCCGCCCGA-3' from position 1-20.

**Anti XbaI Tsr1IP tap:** 5'-GGGTCTAGAGCGCCTGTATGTGTTATTGC-3' complementary to position 752- 771.

### **Oligonucleotides for Primer Extensions:**

**U3 :** 5'-TGCCGTTTCATCGAAC-3', antisense, complementary to positions 107–121 of U3 snRNA.

**SL EXON :** 5'- GGGAGCTTCTCATAC-3', Antisense complementary to positions 40–55 of SL RNA (exon).

**SL INTRON** : 5'- TGCGTCTGTTGGCCC-3', Antisense complementary to positions 65 to 79 of SL RNA(intron).

**Oligonucleotides for Northern blots for sucrose gradient:**

**U2 for L.t.** - TTCTATTCCTTTGCCCCGA

**SL for L.t.** - TTGCCGGAAGACGGGTTCGGA

**S-4: Genes affected by SR proteins and their splicing and poly (A) signals.** We used the splice sites and poly (A) sites published in (1) to compare splicing and poly (A) signals between regulated and non-regulated genes. Each row corresponds to one property of the signals, with the “regulated genes (mean)” column presenting the mean value of the property over all genes regulated in a given experiment and in a given direction (e.g., TSR1 up), and with the “other genes (mean)” column presenting the mean value of the statistic over all other *T. brucei* genes. We then used the Mann-Whitney U (MWU) to compute the significance of the difference. Rows with  $P < 0.001$  are highlighted in bold, and rows with  $P < 0.05$  appear in italics. The SL/Poly (A) diversity is a measure of the heterogeneity of splicing/poly (A) site selection, which is large when splicing is equally likely to take place in any number of sites and is approaching zero when there is only a single site (2). PPT length and PPT-AG distance are based on a PPT computationally predicted as the longest stretch of pyrimidines (separated by at most one purine) in a window of 120 nts upstream of the major splice site. The pyrimidine fraction upstream of splice site is defined in a window of 120 nts upstream of the major splice site, and the purine fraction downstream of splice site is similarly defined in a window of 120 nts downstream of the major splice site.

| Property                                           | TSR1 up-regulated genes   |                    |                  | TSR1 down-regulated genes   |                    |                  |
|----------------------------------------------------|---------------------------|--------------------|------------------|-----------------------------|--------------------|------------------|
|                                                    | Regulated genes (mean)    | Other genes (mean) | P-value (MWU)    | Regulated genes (mean)      | Other genes (mean) | P-value (MWU)    |
| SL diversity                                       | 0.601698                  | 0.588656           | 0.547874         | 0.55519                     | 0.589257           | 0.262472         |
| 5'UTR                                              | <i>198.693</i>            | <i>144.669</i>     | <i>0.0471325</i> | <i>112.025</i>              | <i>145.747</i>     | <i>0.0131667</i> |
| PPT-AG distance                                    | 42.2353                   | 37.482             | 0.291205         | 38.1348                     | 37.5329            | 0.985453         |
| PPT length                                         | 18.8675                   | 18.2912            | 0.332216         | 18                          | 18.3022            | 0.613904         |
| Pyrimidine fraction upstream of splice site        | 0.633333                  | 0.636977           | 0.42491          | <i>0.618539</i>             | <i>0.637172</i>    | <i>0.0126593</i> |
| Purine fraction downstream of splice site          | 0.551569                  | 0.54691            | 0.356263         | <i>0.53427</i>              | <i>0.547134</i>    | <i>0.0331493</i> |
| PolyA diversity                                    | <i>2.30632</i>            | <i>1.94459</i>     | <i>0.030022</i>  | 2.17328                     | 1.94897            | 0.364185         |
| 3'UTR                                              | 660.842                   | 650.248            | 0.289708         | 703.852                     | 649.643            | 0.57085          |
| Distance from polyA site to downstream splice site | 340.871                   | 258.61             | 0.981323         | 349.75                      | 259.092            | 0.97277          |
|                                                    | TSR1IP up-regulated genes |                    |                  | TSR1IP down-regulated genes |                    |                  |

|                                                           |                |                |                  |                 |                 |                    |
|-----------------------------------------------------------|----------------|----------------|------------------|-----------------|-----------------|--------------------|
| <b>SL diversity</b>                                       | 0.506502       | 0.590201       | 0.119977         | 0.658658        | 0.587337        | 0.280052           |
| <b>5'UTR</b>                                              | 122.12         | 145.693        | 0.303528         | <b>95.8462</b>  | <b>146.259</b>  | <b>0.000116102</b> |
| <b>PPT-AG distance</b>                                    | 37.0088        | 37.5496        | 0.743054         | 38              | 37.5309         | 0.674964           |
| <b>PPT length</b>                                         | 17.8584        | 18.3057        | 0.690853         | <b>16.3571</b>  | <b>18.3392</b>  | <b>9.15E-05</b>    |
| <b>Pyrimidine fraction upstream of splice site</b>        | 0.630263       | 0.637044       | 0.347617         | <b>0.618648</b> | <b>0.637319</b> | <b>0.000649488</b> |
| <b>Purine fraction downstream of splice site</b>          | 0.559576       | 0.546755       | 0.149995         | <i>0.53345</i>  | <i>0.547254</i> | <i>0.0361446</i>   |
| <b>PolyA diversity</b>                                    | <i>2.18869</i> | <i>1.94348</i> | <i>0.0321258</i> | 2.18273         | 1.94746         | 0.137246           |
| <b>3'UTR</b>                                              | <i>399.156</i> | <i>659.989</i> | <i>0.0311207</i> | 741.243         | 648.522         | 0.142036           |
| <b>Distance from polyA site to downstream splice site</b> | 236.217        | 261.259        | 0.245146         | 187.033         | 261.742         | 0.475672           |

1. Kolev, N. G., Franklin, J. B., Carmi, S., Shi, H., Michaeli, S., and Tschudi, C. (2010) The transcriptome of the human pathogen *Trypanosoma brucei* at single-nucleotide resolution. *PLoS Pathog* **6**, e1001090
2. Gupta, S. K., Carmi, S., Waldman Ben-Asher, H., Tkacz, I. D., Naboishchikov, I., and Michaeli, S. (2013) Basal Splicing Factors Regulate the Stability of Mature mRNAs in Trypanosomes. *J Biol Chem* **288**, 4991-5006
